# Supplementary material for: Predictors of Echocardiographic Abnormalities in Asymptomatic Individuals with Increased Cardiothoracic Ratio Detected on Chest Radiography
Source: Research Square preprint supplement (doi:10.21203/rs.3.rs-8145976/v1), 2025-12-10
Supplement: Supplementary file 1 [file f7dd96db61b28d697e27f7ac.docx]

**Supplement Table 1. Echocardiographic parameters other than those used to define abnormalities (n=452)**

|  | Echocardiographic abnormalities  (n=339) | No echocardiographic abnormalities  (n=113) | P-value |
| --- | --- | --- | --- |
| Median RWT | 0.50 (0.43-0.57) | 0.43 (0.39-0.50) | < 0.01 |
| Median LVMI – g/m2 | 96.4 (79.7-108.78) | 70.5 (61.9-84.5) | < 0.01 |
| Mean LV diastolic diameter – cm | 4.3 ± 5.0 | 4.2 ± 4.4 | 0.10 |
| Median LV diastolic diameter/BSA – cm/m2 | 2.6 (2.4-2.8) | 2.4 (2.3-2.6) | < 0.01 |
| Median LV systolic diameter – cm | 2.7 (2.4-2.9) | 2.7 (2.4-2.9) | 0.85 |
| Median LV systolic diameter/BSA – cm/m2 | 1.6 (1.4-1.8) | 1.5 (1.4-1.7) | < 0.01 |
| Mean LVEF – % | 67.8 (62.7-71.5) | 66.2 (61.4-69.0) | < 0.01 |
| Median LA volume index – mL/m2 | 34.4 (29.0-37.9) | 26.9 (23.4-30.3) | < 0.01 |
| Median RV diameter basal – cm | 32.0 (29.0-35.3) | 31.0 (28.0-34.0) | < 0.01 |
| Median RV diameter basal index – cm/m2 | 19.2 (17.5-22.3) | 17.8 (15.8-19.3) | < 0.01 |
| Median RV diameter midventricular – cm | 23.0 (20.3-26.0) | 23.0 (21.0-25.0) | 0.70 |
| Median RV diameter longitudinal – cm | 66.0 (61.0-71.4) | 65.0 (61.0-69.0) | 0.27 |
| Median TAPSE – cm | 2.3 (2.1-2.6) | 2.3 (2.1-2.5) | 0.66 |
| Median tissue Doppler S’ velocity – cm/s | 12.6 (11.4-14.0) | 12.1 (11.1-14.1) | 0.08 |
| Median RV longitudinal free wall strain  (three segment) – % | -34.4  ([-31.2]- [-36.7]) | -35.9  ([-32.7]- [-37.2]) | 0.11 |
| Median RA major dimension – cm | 4.6 (4.2-5.0) | 43.2 (40.4-46.1) | < 0.01 |
| Median minor dimension – cm | 3.0 (2.7-3.3) | 2.9 (2.7-3.1) | 0.12 |
| Median RA area – cm2 | 12.5 (10.3-14.5) | 11.7 (10.2-12.8) | < 0.01 |
| Aortic sinus – cm | 3.3 (3.1-3.6) | 3.1 (2.9-3.3) | < 0.01 |
| Aortic sinus index – cm /m2 | 2.0 (1.8-2.2) | 1.8 (1.7-2.0) | < 0.01 |
| Sinotubular junction – cm | 2.7 (2.5-2.9) | 2.5 (2.4-2.7) | < 0.01 |
| Sinotubular junction index – cm /m2 | 1.6 (1.5-1.8) | 1.5 (1.3-1.6) | < 0.01 |
| Proximal ascending aorta – cm | 3.3 (3.0-3.6) | 3.0 (2.8-3.2) | < 0.01 |
| Proximal ascending aorta index – cm /m2 | 2.0 (1.9-2.2) | 1.7 (1.6-1.9) | < 0.01 |

Results are presented as number (percentage), mean ± standard deviation, or median (interquartile range). n; number of patients with available data, Body surface area; BSA, Left atrial; LA, Left ventricular; LV, Left ventricular ejection fraction; LVEF, Left ventricular mass index; LVMI, Right atrial; RA, Relative wall thickness; RWT, Right ventricular; RV, Systolic; S’, Tricuspid annulus plane systolic exertion; TAPSE
